# Supplementary material for: Assessment of an ensemble system that assimilates Jason-1/Envisat altimeter data in a probabilistic model of the North Atlantic ocean circulation
Source: Copernicus journal article supplement (doi:10.5194/os-11-425-2015), 2015-06-04
Supplement: Supplementary file 1 [file os-11-425-2015-supplement.zip]

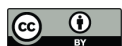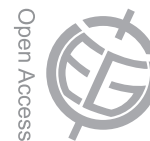

## *Supplement of*

# **Assessment of an ensemble system that assimilates Jason-1/Envisat altimeter data in a probabilistic model of the North Atlantic ocean circulation**

**G. Candille et al.**

*Correspondence to:* G. Candille (candille.guillem@hydro.qc.ca)

- os-11-425-2015-supplement-cover-letter.pdf
- anim\_STD\_fig2\_os-2014-67\_GC.swf

The copyright of individual parts of the supplement might differ from the CC-BY 3.0 licence.
